# Supplementary material for: Positional cues and cell division dynamics drive meristem development and archegonium formation in Ceratopteris gametophytes
Source: Commun Biol. 2022 Jul 1;5:650. doi: 10.1038/s42003-022-03627-y (PMC9249879; doi:10.1038/s42003-022-03627-y)
Supplement: Supplementary file 3 — Supplementary Data 1 [file 42003_2022_3627_MOESM3_ESM.xlsx]

## Sheet: Sheet1
Data for Fig. 4. Number of cell division events for each lineage every six hours. The ID of each cell is shown in Supplementary Fig. 19.
	Number of cell division events during each analyzed period
Progenitor Cell ID at 0h	0h-6h	6h-12h	12h-18h	18h-24h	24h-30h	30h-36h	36h-42h	42h-48h	48h-54h	54h-60h	60h-66h	66h-72h	72h-78h	78h-84h	84h-90h	90h-96h	96h-102h	102h-108h
5	0	1	0	1	1	0	0	0	1	0	0	1	1	0	0	0	1	0
6	0	1	0	2	2	0	2	2	3	2	4	4	3	5	8	5	9	9
7	0	0	1	0	2	0	3	0	3	3	3	4	4	6	5	9	8	19
8	0	1	0	0	2	2	2	0	5	2	6	5	3	13	5	7	15	13
10	1	0	2	0	4	0	7	0	1	2	3	1	1	5	1	3	0	1
11	0	1	0	0	2	0	0	0	0	0	0	0	0	0	0	0	0	0
12	0	0	1	0	0	2	0	0	0	0	0	0	0	0	0	0	0	0
13	1	0	1	1	0	2	0	0	2	3	0	3	0	2	0	1	3	2
15	0	0	0	0	0	0	1	0	1	0	1	0	0	0	0	0	0	0
16	1	0	2	0	2	2	1	2	2	1	2	1	1	1	1	2	0	0
17	1	0	0	2	0	0	0	0	0	0	0	0	0	0	0	0	0	0
18	0	1	0	2	0	1	0	0	0	0	0	0	0	0	0	0	0	0
19	0	1	0	0	2	0	1	0	0	0	0	1	0	0	0	1	0	0
20	0	0	1	0	0	0	0	0	0	0	0	0	0	0	0	0	0	0
21	0	0	1	0	0	1	1	0	0	1	0	0	0	0	0	0	0	0
22	0	0	0	0	0	0	0	0	0	0	0	0	0	0	0	0	0	0
25	0	0	0	1	0	0	0	0	0	0	0	0	0	0	0	0	0	0
26	0	1	0	2	0	0	0	0	1	0	0	0	0	0	0	0	0	0
27	0	0	1	0	0	1	0	0	0	0	0	0	0	0	0	0	0	0
28	0	0	0	1	0	0	0	0	0	0	0	0	0	0	0	0	0	0
30	0	1	0	0	2	0	0	0	0	0	0	0	0	0	0	0	0	0
32	0	0	1	0	0	1	0	0	0	0	0	0	0	0	0	0	0	0
33	1	0	0	0	0	0	0	0	0	0	0	0	0	0	0	0	0	0
34	0	1	0	2	0	0	0	0	0	1	0	0	0	0	0	0	0	0
35	0	0	1	0	0	0	0	0	0	0	0	0	0	0	0	0	0	0
36	0	0	0	0	0	0	0	0	0	0	0	0	0	0	0	0	0	0
37	0	1	0	2	0	0	0	0	0	0	0	0	0	0	0	0	0	0
38	0	0	1	0	0	0	0	0	0	0	0	0	0	0	0	0	0	0
39	0	1	0	0	2	0	0	0	0	0	0	0	0	0	0	0	0	0
40	0	1	0	1	1	0	0	0	0	0	0	0	0	0	0	0	0	0
41	0	0	1	0	0	0	1	0	0	0	0	0	0	0	0	0	0	0
42	0	1	1	1	0	2	0	0	0	0	0	0	0	0	0	0	0	0
45	1	0	0	2	0	0	1	1	0	0	0	0	0	0	0	0	0	0
49	1	0	0	0	0	0	0	0	0	0	0	0	0	0	0	0	0	0
51	0	1	0	0	0	0	0	0	0	0	1	1	0	0	0	0	0	0
