# Supplementary material for: Positional cues and cell division dynamics drive meristem development and archegonium formation in Ceratopteris gametophytes
Source: Commun Biol. 2022 Jul 1;5:650. doi: 10.1038/s42003-022-03627-y (PMC9249879; doi:10.1038/s42003-022-03627-y)
Supplement: Supplementary file 5 — Supplementary Data 3 [file 42003_2022_3627_MOESM5_ESM.xlsx]

## Sheet: Sheet1
Data for Fig. 6. Number of cell division events from 30h to 108h. The ID of each cell is shown in Supplementary Fig. 19.
Progenitor cell ID at 0h	Cell ID at 30h	Number of cell division events from 30h to108h
6	3	16
	5	4
	4	24
	9	9
	19	2
	30	1
7	6	37
	17	6
	7	15
	20	9
8	11	30
	23	9
	13	22
	24	17
