# Supplementary material for: Positional cues and cell division dynamics drive meristem development and archegonium formation in Ceratopteris gametophytes
Source: Commun Biol. 2022 Jul 1;5:650. doi: 10.1038/s42003-022-03627-y (PMC9249879; doi:10.1038/s42003-022-03627-y)
Supplement: Supplementary file 7 — Supplementary Data 5 [file 42003_2022_3627_MOESM7_ESM.xlsx]

## Sheet: Sheet1
Data for Supplementary Fig. 10d. Number of cell division events within the 54-108h time frame in the marginal cells and their adjacent inner cells from three gametophytes.
Marginal Cells	Inner Cells
6	3
9	3
6	5
7	9
12	3
10	7
6	6
8	6
7	3
7	6
7	3
7	2
3	7
4	3
3	6
7	0
12	1
13	7
12	7
8	5
5	1
3	1
2	2
5	3
13	2
6	6
3	6
3	6
3	7
3	5
9	3
9	2
13
14
8
4
3
6
6
7
4
7
9
